# Supplementary material for: Integrated Digital Health Technologies in Multimorbidity Management: Mechanisms, Outcomes, Challenges, and Strategies
Source: Research Square preprint supplement (doi:10.21203/rs.3.rs-5392296/v1), 2024-12-04
Supplement: Supplementary file 1 [file 0a80457d6e75cb6ad20f5bfd.docx]

| Types of DHTs tools and equipment | Barriers | Strategies to address barriers |
| --- | --- | --- |
| Electronic health records (26, 43, 44, 65, 68) |  | - Technology resource (internet connection, mobile & landline telephony) (73) - Financial support (increase health insurance coverage) (43) - Presence of primary care physicians (43) |
| Internet of medical things (wearable devices or sensors) (27-29, 61) | - Clients health condition (29) | - Enhance patient willingness to wear and utilize it (29) - Real-time feedback from the app (29) - Patient longevity in engagement (29) - Enabling standardized exchange of electronic information (60) - Inequality in utilization due to age (75) |
| Websites (49-51) | - Problems-related to log-ins and user Interface design (colour and font) (49) | - Organizational arrangement (51) - Interoperability (51) - Patient engagement in two-way communication (50) |
| mHealth or telehealth or mobile/health apps (30-41, 52, 60, 78) | - Lack of skills (both clients and providers) (60) - Resistance from both clients and providers (60) - Inadequate infrastructure (e.g., poor internet) (40, 60) - Lack of technical support (60, 67) - Incompatibility between different eHealth tools (60) - Lack of financial support (60) - Privacy/security issues (60) - Inadequate legislative framework for using eHealth tools (60) | - Technical support (41) - Clarification of roles and responsibilities (78) - Information exchange between providers are essential (78) - Enhance shared understanding (83) - Self-management support (52) - Delivery system design (52) - Clinical decision support (52) - Clinical information system (52) - eHealth education (52) - Previous exposure (40) - Provide comprehensive information (30, 78, 80, 82) - Patient engagement in two-way communication (80) - Perceived benefits (79) - Apply among stable clients (79) - Skills and knowledge development for clients and providers (79) - Self-management support (78, 80) - Addressing ethical issues (50, 79, 84) |
| Artificial intelligence (45-48, 70) | - Data quality issues and bias (48) |  |
| X10-based smart home technology (56) | - Clients' unfamiliarity with computers and inability to learn how to use them (56) - Hidden running programs (56) - Computer virus computer (56) - Bad RAM chip or conflict (56) - Unable to connect to the Internet (56) - Old phone lines and/or old electricity lines interfered with the use of X10 via computer (56) | - Technical support (56) |
