# Supplementary material for: Integrated Digital Health Technologies in Multimorbidity Management: Mechanisms, Outcomes, Challenges, and Strategies
Source: Research Square preprint supplement (doi:10.21203/rs.3.rs-5392296/v1), 2024-12-04
Supplement: Supplementary file 2 [file b6bd5504bdac1ffd74c88b65.docx]

| Types of DHTs tools and equipment | Mechanisms of actions and/or activities in implementing DHTs | Outcomes of DHTs Resolved problems |
| --- | --- | --- |
| Electronic health records (26, 43, 44, 65, 68) | - Electronic prescription (26) - Data entry and record (68) - Reinforcement learning algorithms within EHRs (65) | - Timely communication (68) - Information sharing (68) - Manage clients’ health data, enhanced person-centered care (65) - Improve accuracy of documentation (68) |
| Internet of medical things (wearable devices or sensors) (27-29, 61) | - Glucose monitors attached to patients’ phones equipped with web-based physician communication (61) - Make appointment & monitor their own health (60) (27-29, 61) - Wireless Bluetooth-enabled blood pressure cuffs paired with internet hubs (66) | - Tele communication (61) - Data management (collect, record), client empowerement (60) - Telemonitoring and caring (27-29) - Minimize the unexpected health complications (28) - Enhance recovery from illness (61) - Integration/management of care (60) |
| Mobile lines (26) | - Messaging between clinicians and patients (26) - Telemonitoring (26) - Facilitate post-treatment discharge (26) - A real-time phone referral of clients to a pharmacist (63) | - Timely communication (26) - Information sharing (26) |
| Websites (49-51) | - Educational platforms (26) - Web-based educational resources and healthcare tools (49, 50) | - Closing Knowledge gap (49-51), - Reduce emergency visits and increased primary care visits (26) - Improved coordination between health workers and clients & care providers (50, 51) |
| Computer (23) | - Computer-based therapy combined with motivational and cognitive behaviour (23) | - Reduce cannabis use and substance use (23) |
| mHealth or telehealth or mobile/health apps (30-41, 52, 60, 78) (21, 58-60, 67) (21, 57, 63) | - Electronic messaging and health information exchange (30) - Video conferencing (e.g., Skype), ePrescriptions (35-41, 60) - On-call consultations or video conference (21, 58, 67) - Electronic reminders and computerized self-management tools or online decision supports (58, 60) - Displays medication images and sounds an alarm at medication times (69) - Clients enter health data (60) - Conduct weekly nurse phone calls (59) - Tele-assistance services using light paths (42) - Patients enter their data, access and print information (21, 32) - Smart phone learning of and the moderate exercise (34) | - Collaboration (33) - Generate decision support recommendations (30, 60) - Communication(30, 60) - Closing knowledge gap (58, 60) - Remote monitoring & caring (59, 60) (63) - Unidentified potentially drug-related symptoms (63) - Clients data management (21, 32) - Quality of care (37, 60), safety (reduced medication errors) (69) - Reduced the incidence of unintentional falling at home (42) - Reduced metabolic complications (71) - Recovery from illness (67)(61) - Improved management of care (60) - Enhance detection of key clinical symptoms (21, 57) - Quality of life (59, 60, 72) - Improved cognitive & physical wellness and preventing functional loss (42) - Maintained physical and cognitive status (34) - Cost-efficiency (60), reduced travelling, direct and indirect costs (35), - Increased service acceptability (35, 36) - Improves care integration/management (60) - Reduced number patients admitted in hospitals (58) - Enhance acceptability of services (40) |
| Tablet computer (31, 64) | Nurses enter patient data (64) |  |
| Artificial intelligence (45-48, 70) | - Analyze pattern (45-48, 70) - Recommend treatment options (45-48, 70) - Identify high-risk comorbidities (45-48, 70) | - Client’s health data management (45-48) - Causing administrative burden (48) |
| Ambient assisted living technologies (55) | - Client follow their own health condition (55) | - Client empowerment (55) - Improve cognitive & physical wellness (55) - Prevent functional loss (55) - Reduce workload on health care providers (55) |
| X10-based smart home technology (56) | - Remote monitoring and caring (56) | - Client empowerment (56) - Increased service acceptability (56) - Maintained users’ physical and cognitive status (56) - Supports social interactions (56) |
| Combined (Mobile and Website, QR codes) (52-54);  A web tool linking an EHR(68) | - Data input for automated algorithms (68) - Clinician feedback reports (68) - Patient feedback reports (68) | - Acceptability of technologies (54) - Improved communication among professionals (52) - Communication (68) - Correction of medication discrepancies but had no effect on number of medications or reduction in PIM (68) |
