# Supplementary material for: Integrated Digital Health Technologies in Multimorbidity Management: Mechanisms, Outcomes, Challenges, and Strategies
Source: Research Square preprint supplement (doi:10.21203/rs.3.rs-5392296/v1), 2024-12-04
Supplement: Supplementary file 3 [file cccd95c1f5d34f1c1423f75a.docx]

| Author/Year | Country | Study design | Diseases condition | Digital intervention | Findings |
| --- | --- | --- | --- | --- | --- |
| Mateo-Abad M et al 2020 (26) | European regions | Quasi-experimental study | chronic patients aged 65 or older | Twelve relevant ICT tools for Integrated Care support* | Reduce emergency visit, while increase visits of general practitioners & primary care nurses |
| Atalla S et al 2022 (28) | UAE & India | Implementation study | Multimorbidity | Wearable sensor networks | Involved stakeholders: End users. Healthcare authorities, healthcare providers, and application integrators |
| Kenning C et al 2024 (29). | United Kingdom (UK) | Qualitative study | 18+ with multimorbidity | Smartwatch app | More 'real-time' feedback from the app should be available to maintain engagement over a longer period; the presence of severe or chronic pain was a barrier |
| Parvaneh S et al 2017 (27) | USA | Quantitative: cross-sectional | older adults with multimorbidity | Wearable technology | Help to identify frailty status by monitoring postural transition |
| Haverhals LM et al 2011 (30) | USA | Qualitative study | Older adults with multi-morbidity | Personal health applications | Self-medication management processes challenges: seeking reliable medication information, maintaining autonomy in medication treatment decisions, worrying about taking too many medications, reconciling information discrepancies between allopathic and alternative medical therapies, and tracking and coordinating health information between multiple providers |
| Siek KA, et al 2010 (31) | USA | Implementation study | Older adults with multi-morbidity | Interoperable Personal Health Application | Designed an application based on the real-world artifacts and workflows for medication management |
| Bousquet J et al 2018 (32) | European regions | Interventional study | allergic rhinitis and asthma multimorbidity in the elderly | ICT tools | Deployed the apps |
| Reeder B et al 2013 (33) | USA | Qualitative study | Older adults with multi-morbidity | Medication dispensing device in home care | Clients responded the tool is very easy to use, very reliable and helpful in the management of their medications, as well as participants expressed a desire to use the machine in the future |
| Lee S-C et al 2019 (34) | Taiwan | Quasi-experimental study | Middle-Aged and Older Adults | Health Promotion Program Combining Smart Phone Learning and Exercise | Reduced frailty and improved exercise |
| Pariser P et al 2019 (35) | Canada | Mixed-methods study | People with multimorbidity | Telemedicine | Clients responded that telemedicine improved their access to interdisciplinary resources, feeling hopeful their conditions would improve as a result, they would use it again, and improved confidence in managing their patient's care, and the cost was about 22% less than that of a 1-day hospital admission through the emergency department. |
| Wiseman JT et al 2015 (36) | USA | Quantitative: survey | People with multimorbidity | Smartphone | Older patient cohort with significant comorbidity is able and willing to adopt a smartphone-based postoperative monitoring program |
| Valdivieso B ET AL 2018 (37) | Spain | Interventional study | high-risk patients with multiple chronic conditions | Telehealth, telephone support | Improved quality of life, but no differences in mortality or utilization were found |
| Martín-Lesende I et al 2016 (38) | Spain | Descriptive longitudinal study | Patients with multimorbidity (heart failure and/or lung disease) | Telemonitoring | Telemonitoring studies; technology help to collect data |
| Takahashi PY et al 2012 (39) | USA | A randomized controlled trial | older adults with multiple health issues | Telemonitoring | Reduced hospitalizations and emergency department visits |
| Schmidt S et al 2019 (40) | German | Qualitative study | older people with multimorbidity | Personal‐online case management (video conferences) | Offers formative and organisational support in various life-domains. |
| Berner J et al 2016 (41) | Sweden | Qualitative study | frail older adults | Ablet computers and Skype | Conflicting feelings did emerge to adopt in the future; skype needs to be tested; technical support and well-functioning technology are important |
| Tchalla AE et al 2012 (42) | France | Prospective cohort study | frail elderly population | Home-based technologies combined with a monitoring assistive center (light path coupled with tele-assistance service) | Reduced the incidence of unintentional falling at home |
| Wang H et al 2023 (43) | USA | Cross-sectional study | adult emergency department patients with multimorbidity. | Patient portal use (MyChart) | One in five adults used patient portals; having primary care physicians and insurance promote patient to use MyChart |
| Williams TB et al 2022 (44) | USA | Cross-sectional study | Multimorbidity | Electronic health records (EHRs) | EHRs used for research purpose |
| Cesario A et al 2021 (45) | Not specified | Not clear | Multimorbidity and cancer | Artificial intelligence | Integrate and manage heterogeneous data |
| Hassaine A et al 2020 (46) | Non-specific | Review | Multimorbidity | Machine learning | Improved the complex relationships between diseases; |
| Majnarić LT et al 2021 (47) | Non-specific | Review | Multimorbidity | Artificial intelligence | Managed big data |
| Ambagtsheer R et al 2020 (48) | Australia | Cross-sectional study | frailty within a residential aged care | Artificial intelligence | Identified frailty within a residential aged care using administrative data; potential benefits will need to be weighed against administrative burden, data quality concerns and presence of potential bias |
| Portz JD et al 2019 (49) | Not specified | Qualitative study (Focus group discussion) | older adults with multiple chronic conditions | Patient portal user interface and user experience | The portal was seen to be easy to use, simple, and quick, challenges related to log-ins, user interface design (color and font), and specific features; Older adults are interested in using patient portals because the portal improved patient-provider communication, saved time and money, and provided relevant health information. |
| Macdonald GG et al 2018 (50) | Canada | Qualitative study (interview of nurses & physician) | Multimorbidity | eHealth technologies | Ethical issues raised |
| Martínez-García A et al2013 (51) | Spain | Implementation study | Multimorbidity | Social network and open-source tools | Professionals valued positively all the items; Open source with the social network encourages adoption and facilitates collaboration; allow communication and coordination |
| de Jong CC et al 2016 (52) | Netherlands | Implementation study & survey from professionals | home-dwelling elderly patient | E-communication tool | An e-communication tool (Congredi) was usable for improving multidisciplinary communication among professionals |
| Levine DM et al 2018 (53) | USA | Longitudinal cohort | Seniors in declining health | Digital health technology | Seniors with new dementia, relocation to a nursing home, and declining physical performance seem especially poor candidates for technology interventions |
| Tseng M-H et al 2014 (54) | Taiwan | Implementation study | Elders in outpatients | QR code and Web services | Highly accepted by the elderly |
| Dupuy L et al 2017 (55) | Not specified | Experimental study | Frail older adults and their caregivers | Ambient assisted living technologies (AAL) (includes sensors, online store applications, tablets) | AAL is a relevant environmental support for preventing both functional losses in Frail older Individuals and objective burden professional caregiver. |
| Tomita MR et al 2007 (56) | USA | Random controlled trail | Frail elders | A computer with Internet access and X10-based smart home technology | Almost all participants recommended its use by others, and it maintained physical and cognitive status of intervention groups |
| Wakefield BJ et al 2012 (21) | USA | A single center randomized controlled clinical trial | Patients with diabetes and hypertension | Telehealth | Improved knowledge, but no significant differences were found across the groups in self-efficacy, adherence, or patient perceptions of the intervention mode |
| Wakefield BJ et al 2011 (57) | USA | A single center randomized controlled clinical trial | Comorbid diabetes and hypertension | Telehealth | Enhanced earlier detection of key clinical symptoms requiring intervention |
| Lear SA et al 2021 (58) | Canada | A randomized Clinical Trial | Multiple chronic conditions | Interactive Digital Health–Based Self-management Program | Reduced hospitalizations |
| Bernocchi P et al 2018 (59) | Not specified | A randomized controlled trail | older patients with chronic obstructive pulmonary disease and heart failure | Home-based telerehabilitation | It was feasible and effective |
| Melchiorre MG et al 2018 (60) | European region | Qualitative study (survey of programmers0 | People with multimorbidity | eHealth | eHealth improved care integration/management, quality of care/life and cost-efficiency, whereas inadequate funding represents a major barrier |
| Yoo H et al 2009 (61) | South Korea | A randomized controlled clinical trial | Type 2 diabetes and hypertension | Cellular phones and the internet | Improved multiple metabolic parameters |
| Park MJ et al 2009 (62) | South Korea | a quasi-experimental design | obese patients with hypertension | Web-based intervention by way of cellular phone and Internet | Improved blood pressure, body weight, waist circumference, and HDL-C |
| Schiff GD et al 2019 (63) | Not specified | A randomized trail | hypertension, diabetes, depression, and insomnia | Automated calls coupled with phone-based pharmacist counseling | Identified a substantial number of previously unidentified potentially drug-related symptoms |
| Prabhakaran D et al 2019 (64) | India | A randomized trail | multiple chronic conditions (hypertension, diabetes mellitus, current tobacco and alcohol use, and depression) | mHealth-based electronic decision support system | No differences observed between intervention and control groups |
| Zheng H et al 2021 (65) | USA | Retrospective cohort | Multimorbidity | Reinforcement learning of electronic health records | Substantial improvements in glycemia, blood pressure, and CVD risk outcomes |
| Rifkin DE et al 2013 (66) | USA | A randomized trail | older patients with kidney disease and hypertension | Wireless blood pressure monitoring | Led to greater sharing of data between patients and clinic and produced a trend toward improvements in BP control over usual care |
| Donesky D et al 2017 (67) | USA | A controlled nonrandomized trial | chronic obstructive pulmonary disease and heart failure | Home-based TeleYoga | Patients perform yoga safely in the home setting; TeleYoga was acceptable, and adherence was good, while technical issues were a barrier. |
| Fried TR et al 2017 (68) | Not specified | A randomized clinical trial | Veterans aged 65 and older | A web tool linking EHRs | Improved communication about medications and accuracy of documentation |
| Mira JJ et al 2014 (69) | Spain | A randomized clinical trial | elderly patients taking multiple medications | A Spanish pillbox app | Improved adherence, helps reduce rates of forgetting and of medication errors, and increases perceived independence in managing medication |
| Jennings MV et al 2022 (70) | USA | Cross-sectional study | High-risk comorbidities | EHRs | EHR prescription can serve as a platform to characterize complex risk markers |
| Orlandoni P et al 2016 (71) | Italy | A randomized prospective study | Frail older patients | Video consultation | A video consultation between home visiting staff and hospital physicians reduced metabolic complications in a population of frail older patient |
| Persson HL et al 2020 (72) | Sweden | Longitudinal study | Elderly multimorbid COPD and chronic heart failure | telemonitoring and hospital-based home care | Improved quality of life |
| Kay‐Lambkin FJ et al 2009 (23) | Australia | a randomized controlled trial | comorbid depression and problematic alcohol and/or cannabis use | Computer‐based psychological treatment | Computer-based integrated interventions could be involved for managing depression and cannabis use |
| Marcolino MS et al 2021 (73) | Brazil | Mixed-methods study | Hypertension and diabetes | Clinical decision support system | Applicable in the context of primary health care settings in low-income regions, with good user satisfaction and potential to improve adherence |
| Manning SE et al 2023 (74) | USA | Cross-sectional study | Multimorbidity | Health information technology (HIT0 | Disparities by age and multimorbidity in using HIT |
| Seifert A et al (75) | Switzeralnd | Cross-sectional study | Older adults | mobile device use (smartphone, tablet, fitness tracker, and smartwatch), health app use (e.g., health insurance apps, fitness apps), | 75.0% of the participants used at least one mobile device; 22.9% used health-related apps. Younger individuals and those with a strong interest in new technology had a higher likelihood of using health apps. Participants were more often willing to share their data with doctors than with health insurance companies or researchers |
| King BL et al 2022 (76) | USA | Cross-sectional study | Multimorbidity in patients with heart failure | EHRs | The EHR-based problem list captures multimorbidity with moderate to-good accuracy |
| Vos J et al 2018 (77) | England | Mixed-methods study | Older adults with multimorbidity | Care Navigation | Navigating one’s personal care network rested mainly on patients’ shoulders |
| Ekstedt M et al 2021 (78) | Sweden | Implementation study | Older adults with chronic diseases | A web-based application electronic Patient Activation in Treatment at Home) | Feasibility study revealed redesign and highlighted the importance of adequately addressing not only varying user needs but also the complex nature of healthcare organizations when implementing new services and processes in chronic care management. |
| Buawangpong N et al (79) | Thailand | Qualitative study | Older Adults with Multimorbidity | Telemedicine | perceived benefit of telemedicine among older adults with multimorbidity, appropriate use of telemedicine for multimorbid care, telemedicine system catering to the needs of older patients, and respect patients’ decision to decline to use telemedicine |
| Wathne H et al 2023 (80) | Norway | Qualitative study | Post-hospitalization long-term illness | eHealth service | Expecting information, reassurance, and guidance when using eHealth for heart failure and colorectal cancer self-management; expecting eHealth to be comprehensible, supportive, and knowledge promoting; and recognizing both the advantages and disadvantages of eHealth for heart failure and colorectal cancer self-management |
| Ancker JS et al 2015 (81) | USA | Qualitative study | Patients with multimorbidity | HIT for data tracking | Overload on patients, provoke strong positive and negative emotions, value judgments, and diverse interpretations, and patients often notice that physicians trust technologically measured data such as lab reports over patients' self-tracked data. |
| Zulman DM et al 2015 (82) | USA | Qualitative study | patients with multiple chronic conditions | eHealth technology | Patients with multiple chronic conditions manage a high volume of information, visits, and self-care tasks; they need to coordinate, synthesize, and reconcile health information from multiple providers and about different conditions; their unique position at the hub of multiple health issues requires self-advocacy and expertise. Focus groups identified desirable eHealth resources and tools that reflect these themes |
| Greenhalgh T et al 2015 (83) | United Kingdom | Qualitative study | Clients with multimorbidity and key informants | Telehealth | Quality telehealth or telecare is 1) ANCHORED in a shared understanding of what matters to the user; 2) REALISTIC about the natural history of illness; 3) CO-CREATIVE, evolving and adapting solutions with users; 4) HUMAN, supported through interpersonal relationships and social networks; 5) INTEGRATED, through attention to mutual awareness and knowledge sharing; 6) EVALUATED to drive system learning |
| Runz-Jørgensen SM et al (84) | Denmark | Qualitative study | People living with multimorbidity | eHealth | Patient-perceived value of eHealth varied, depending on their burden of illness and treatment: those with a greater burden had more positive perceptions of eHealth, and expressed more intention to use it. |

* Electronic prescription, Messaging clinician and Patients, Electronic Health Record, Interconsultation, Call Center, Virtual Conference, Personal Health Folder, Nurse Information System, Educational Platform, Collaborative Platform, Telemonitoring and Multichannel Centre
